# Supplementary material for: Five Rice Seed-Specific NF-YC Genes Redundantly Regulate Grain Quality and Seed Germination via Interfering Gibberellin Pathway
Source: MDPI journal article supplement (doi:10.3390/ijms23158382), 2022-07-29
Supplement: s1 [file s1]

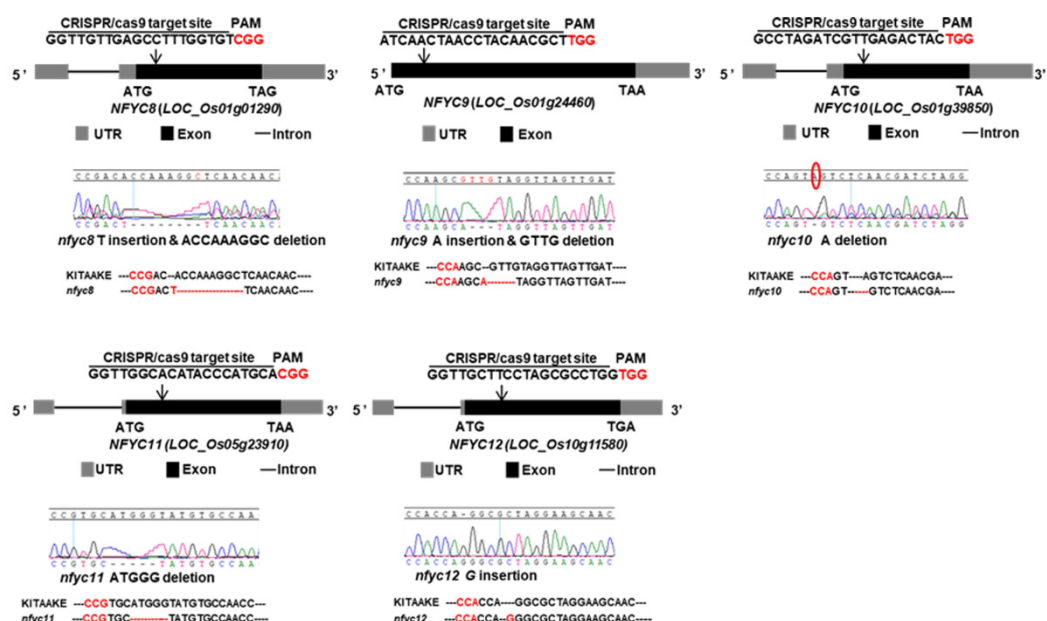

**Figure S1** Genotyping of Kitaake and five *single-nfyc* lines. Sanger sequencing of the target sites in five single gene mutants of *nfyc8* to *nfyc12*. Red bases represent PAM, and red circles indicate insert or delete bases.

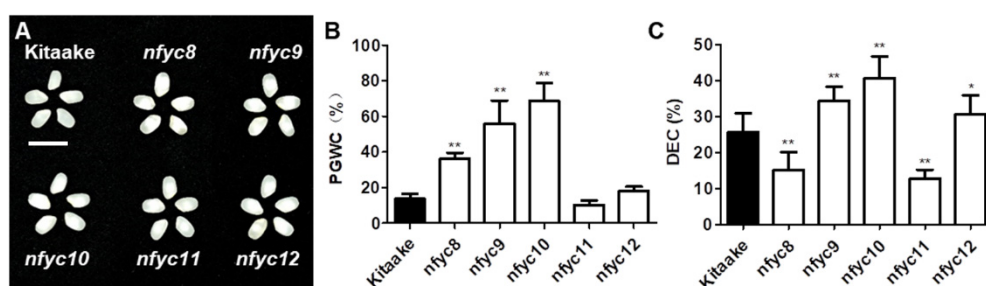

**Figure S2** A Grain chalkiness phenotypical characterization of Kitaake and five single mutants, bar=1cm. **B.** Statistics of chalkiness grain rates of the five single mutants and Kitaake. **C.** Statistics of chalkiness degrees of the five single mutants and Kitaake. Bar=1cm.

Data are shown as means  $\pm$  SD of at least three biological replicates. (\* $P < 0.05$ , \*\* $P < 0.01$  by two-tailed Student's t-test).

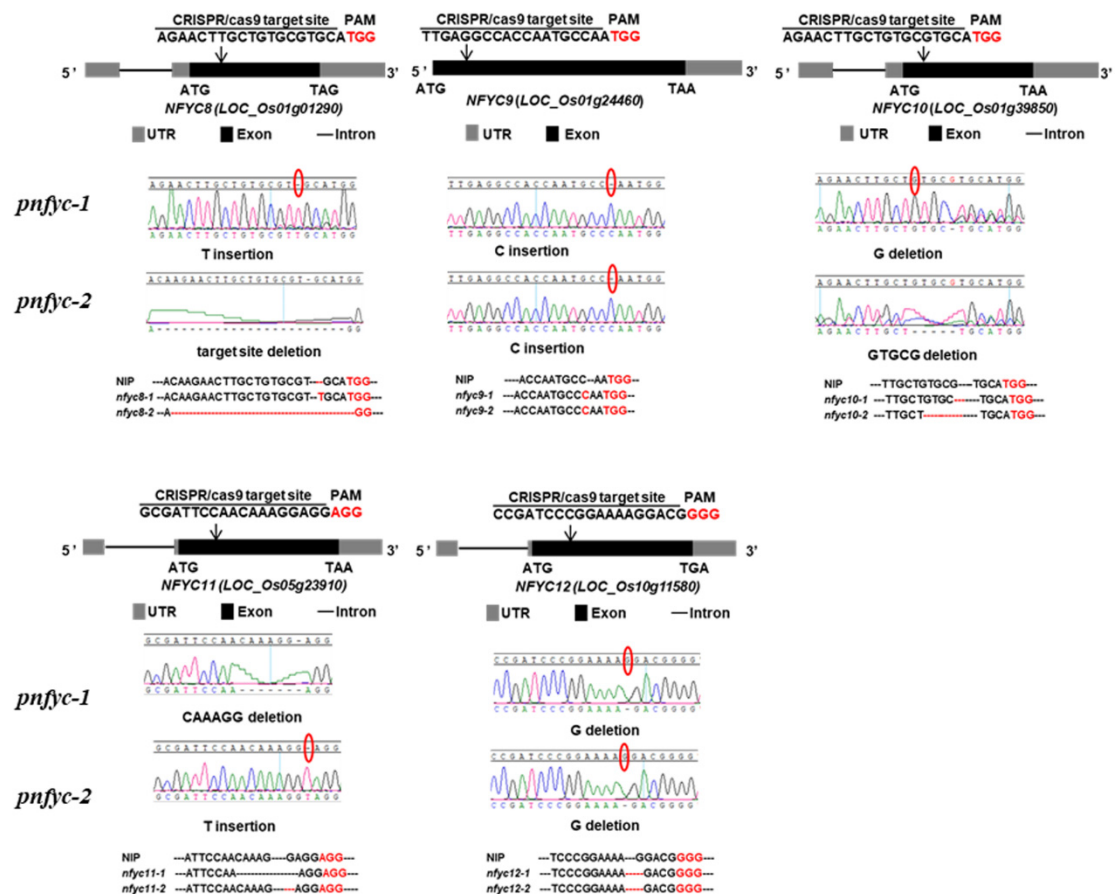

**Figure S3** Genotyping of NIP and *pnfy* lines. Sanger sequencing of the five target sites in *pnfy* (*cr-nfy8/y9/y10/y11/y12*) mutants showed two mutation types. Red bases represent PAM, and red circles indicate insert or delete bases.

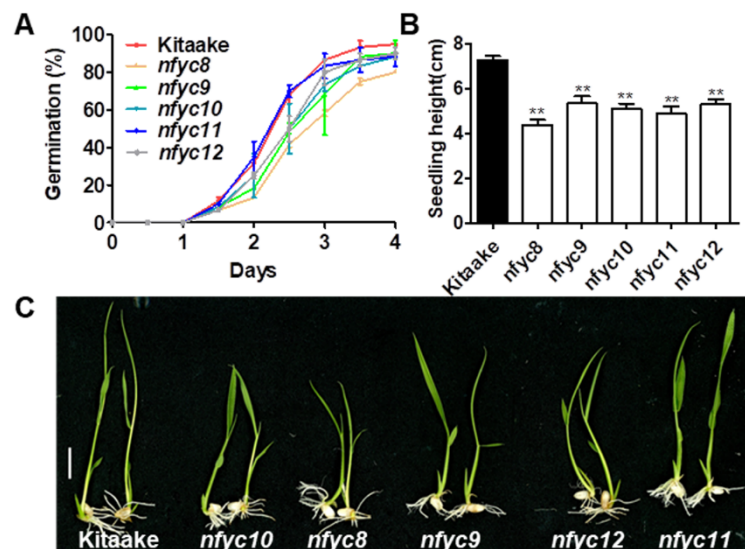

**Figure S4** **A** The germination rate of Kitaake and five single mutants in 4 days. **B**. Statistics of the seedling height of Kitaake and five single mutants at 7 days after germination. **C**. The plant morphology of Kitaake and five single mutants at 7 days after germination. Bar=1cm. Data are shown as means  $\pm$  SD of at least three biological replicates. (\* $P < 0.05$ , \*\* $P < 0.01$  by two-tailed Student's t-test).

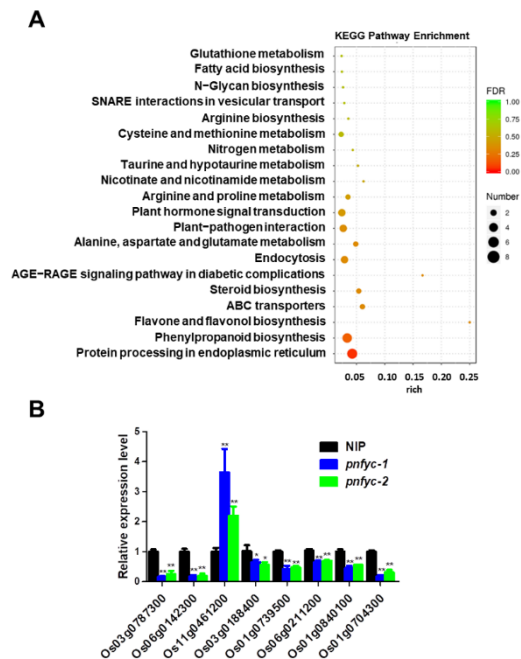

**Figure S5** **A** One selection of KEGG pathway enrichment assay of the differentially expressed genes (DEGs) as determined by RNA-seq using embryos at 6 hours after germination. **B** qRT-PCR validation of the transcript levels of DEGs obtained from the RNA-seq results.

|                | Plant height<br>(cm) | Panicle length<br>(cm) | No.primary<br>branch panicle | No.secondary<br>branch panicle | No.effective<br>panicles per<br>plant | Seed setting<br>rate(%) |
|----------------|----------------------|------------------------|------------------------------|--------------------------------|---------------------------------------|-------------------------|
| NIP            | 99.07±4.31           | 21.44±1.34             | 11.56±1.78                   | 16.55±6.78                     | 8.40±2.48                             | 86.41± 8.19             |
| <i>pnfyc-1</i> | 99.40±4.09           | 21.27±1.30             | 11.11±1.10                   | 15.22±4.94                     | 7.90±1.88                             | 84.93±7.20              |
| <i>Pnfyc-2</i> | 97.20±2.66           | 21.38±1.80             | 11.21±1.20                   | 15.11±5.11                     | 7.50±1.61                             | 84.05±7.75              |

**Table S1** Quantification data of the panicle traits and plant height among NIP and *pnfyc* lines. Data are shown as means ± SD of at least three biological replicates. (\*P < 0.05, \*\*P < 0.01 by two-tailed Student's t-test).

|                | Onset temperature (°C) | Peak temperature (°C) | End set temperature (°C) |
|----------------|------------------------|-----------------------|--------------------------|
| NIP            | 67.84±0.04             | 72.54±0.08            | 78.46±0.03               |
| <i>pnfyc-1</i> | 65.86±0.33 **          | 70.57±0.62*           | 76.61±0.14**             |
| <i>Pnfyc-2</i> | 65.77±0.22**           | 70.48±0.53*           | 76.12±0.21**             |

**Table S2 Differential scanning calorimetry assay. Quantification data of gelatinization temperature among NIP and *pnfyc* lines. Data are shown as means ± SD of at least three biological replicates. (\*P < 0.05, \*\*P < 0.01 by two-tailed Student's t-test).**
