# Supplementary material for: Five Rice Seed-Specific NF-YC Genes Redundantly Regulate Grain Quality and Seed Germination via Interfering Gibberellin Pathway
Source: Int J Mol Sci. 2022 Jul 29;23(15):8382. doi: 10.3390/ijms23158382 (PMC9368926; doi:10.3390/ijms23158382)
Supplement: Supplementary file 1 [file ijms-23-08382-s001.zip › ijms-1765517-supplementary Table S3.xlsx]

## Sheet: Primer List
Table S3. Sequences of primers used in this study.
Name	Gene ID	Primer sequence (5' to 3')	Usage
cr-NYC8-F	LOC_Os01g39850	GCCTAGATCGTTGAGACTACtgg	CRISPR/Cas9 site of NFYC8
cr-NYC8-R		ccaGTAGTCTCAACGATCTAGGC
cr-NYC9-F	LOC_Os01g01290	GGTTGTTGAGCCTTTGGTGTcgg	CRISPR/Cas9 site of NFYC9
cr-NYC9-R		ccgACACCAAAGGCTCAACAACC
cr-NYC10-F	LOC_Os01g24460	GTCAACTAACCTACAACGCTtgg	CRISPR/Cas9 site of NFYC10
cr-NYC10-R		ccaAGCGTTGTAGGTTAGTTGAC
cr-NYC11-F	LOC_Os10g11580	GGTTGCTTCCTAGCGCCTGGtgg	CRISPR/Cas9 site of NFYC11
cr-NYC11-R		ccaCCAGGCGCTAGGAAGCAACC
cr-NYC12-F	LOC_Os05g23910	GGTTGGCACATACCCATGCAcgg	CRISPR/Cas9 site of NFYC12
cr-NYC12-R		ccgTGCATGGGTATGTGCCAACC
U3 NF-YC8-F	LOC_Os01g39850	GGCAAGAACTTGCTGTGCGTGCA	CRISPR/Cas9 site of pnfyc
U3 NF-YC8-R		AAACTGCACGCACAGCAAGTTCT
U3 NF-YC9-F	LOC_Os01g01290	GGCAAGAACTTGCTGTGCGTGCA
U3 NF-YC9-R		AAACTGCACGCACAGCAAGTTCT
U6a NF-YC10-F	LOC_Os01g24460	GCCGTTGAGGCCACCAATGCCAA
U6a NF-YC10-R		AAACTTGGCATTGGTGGCCTCAA
U6c NF-YC11-F	LOC_Os10g11580	TCAGCCGATCCCGGAAAAGGACG
U6c NF-YC11-R		AAACCGTCCTTTTCCGGGATCGG
U6b NF-YC12-F	LOC_Os05g23910	GTTGGCGATTCCAACAAAGGAGG
U6b NF-YC12-R		AAACCCTCCTTTGTTGGAATCGC
kJC-NY8-F	LOC_Os01g39850	TGGAGGCAATGGCTTTAGCA	Identify the single mutation site of nfyc
kJC-NY8-R		ACTGCAATGTAACATCGTTTTGC
kJC-NY9-F	LOC_Os01g01290	GCAGTTGCAGCTCAAGTAAGG
kJC-NY9-R		ATGCTGGCATGTCAAAGGAC
kJC-NY10-F	LOC_Os01g24460	CCTATGGCCCGCTTGAAGAA
kJC-NY10-R		TTCACAATGGGTGTGGGTGC
kJC-NY11-F	LOC_Os10g11580	CTCATCCTTCGTGCTTGGGT
kJC-NY11-R		TTGTGCTGTTTCGCCTTTCG
kJC-NY12-F	LOC_Os05g23910	CAAAGGAGGAGGTGGAGCAG
kJC-NY12-R		ACTTCCTAGTGCCTTGTGGC
JCNY8-F	LOC_Os01g39850	ACAAAGGACTTTAGCGAGCAT	Identify the mutation site of pnfyc
JCNY8-R		TATGTAGGAGCAAATTGTGGC
JCNY9-F	LOC_Os01g01290	CTATTATTCGGAGCAACAAAGG
JCNY9-R		CTCACGGTGATTATGGAGGAT
JCNY10-F	LOC_Os01g24460	ATGAAGCAAACTTTGGATGT
JCNY10-R		GAAGGTTGATCAACTAACCTA
JCNY11-F	LOC_Os10g11580	ACATATTGCTATTATCTAAGTTTGC
JCNY11-R		ATAACATCATACCACCCTCCT
JCNY12-F	LOC_Os05g23910	AGTGGCTATACTTCCAACGAG
JCNY12-R		ACATTCTTCACGCAGTCAATT
Ubi-qRT-F	LOC_Os03g13170	GCTCCGTGGCGGTATCAT	qRT-PCR
Ubi-qRT-R		CGGCAGTTGACAGCCCTAG
qRT-NFYC8-F	LOC_Os01g39850	AATGACGGTGTTTTGCGCAC	qRT-PCR
q-RT-NFYC8-R		TTGGGTTTGCTAACATCACG
qRT-NFYC9-F	LOC_Os01g01290	AATGCAAGTGTTGCGGATGG
qRT-NFYC9-R		AATCATCGGCCGTTCCTAAT
qRT-NFYC10-F	LOC_Os01g24460	TCCTACAACTGCACAATGG
qRT-NFYC10-R		GCCAGAGGGAGCAATATTT
qRT-NFYC11-F	LOC_Os10g11580	ATGCTATTGTTGGTGAAAAC
qRT-NFYC11-R		GAAGATCTTTGTCAGGAAAA
qRT-NFYC12-F	LOC_Os05g23910	CAACCATGAGCATATACTACC
qRT-NFYC12-R		GATAGCATCATAGCATCATT
qSD1-F	LOC_Os01g66100	GTGCAACTACTACCCGCCAT
qSD1-R		AAGGTGTCGCCGATGTTGAT
qKS1-F	LOC_Os04g52230	ATAGCATAGGCTCTTGGTCAG
qKS1-R		TATTCCGTCTTTAACATCTGG
qKS2-F	LOC_Os04g52240	CGTATGTTGCGTATGAATGGA
qKS2-R		CAAGATGGTATAGAAGGGAAA
qCPS1-F	LOC_Os02g17780	TCATCTCCAAGGACCTACCAG
qCPS1-R		AGGCCATTCTCAATGAACCAC
qKO2-F	LOC_Os06g37364	TACAATGCTACTGTGACCGACAT
qKO2-R		AATCCTTTCCTTCTGCTGCTT
qKOS1-F	LOC_Os06g37300	TGCACAGAAACAGTTTCGCG
qKOS1-R		TAGTCCCTCCAGTCAGCCTC
qKOS2-F	LOC_Os06g37224	ACAGGAATGGCTTTACCGGG
qKOS2-R		TTGATCATCACCTGGGTGCC
qGA20ox1-F	LOC_Os03g63970	GTGAGTACCTGGTGCGGAAGC
qGA20ox1-R		CACGCCGGGTAGTAGTTGAGG
qGA20ox3-F	LOC_Os07g07420	TCGCTCACCTTCTTCCTCAAC
qGA20ox3-R		AGGCTTTCATAGCCATTCCTT
qGA3ox1-F	LOC_Os05g08540	GATCTCCATGCCCTACTTCCT
qGA3ox1-R		GTCCTCTTCCTTCGCTACTCG
qGA2ox1-F	LOC_Os05g06670	GCCATGAAGAAGCTCGCATG
qGA2ox1-R		TCCCACCATTGCTAGCCTTG
qGA2ox3-F	LOC_Os01g55240	AAGTCTAGGGTTTCCTTCATC
qGA2ox3-R		GGCAGCCTTCTTGTACTCATC
qGA2ox5-F	LOC_Os07g01340	ATGGAGGAGCACGACTACGAC
qGA2ox5-R		GGTTGGTCACCTGGAAGAAGC
qGA2ox6-F	LOC_Os04g44150	ACATCGGCGATCTGTTTCAGG
qGA2ox6-R		AGTTTGGGAGGCCAATCTTTT
qGA2ox10-F	LOC_Os05g11810	GTACGGGAGCAAGAGGATCG
qGA2ox10-R		CCTCCCACATCATCGCTCTC
qPYL1-F	LOC_Os01g61210	ACAAGCACTTCATCCGCAG
qPYL1-R		GTGACGGATCGGTAGTTGCG
qPYL5-F	LOC_Os05g12260	GTCCATCCGGAGAGCATCG
qPYL5-R		CTAGCCGCTCTGATACCTCG
qPqP2C06-F	LOC_Os01g40094	TGCAAGGATCGAGGCAGAAG
qPqP2C06-R		ATTCGCTTGCGAGCAACATC
qABIL2-F	LOC_Os05g51510	TTGTCGCTCGTGCAAAAGAC
qABIL2-R		AGCTTGGACAAGTAGTCGGC
qABIL1-F	LOC_Os01g40094	TTGGTGTTCTTGCCATGTCG
qABIL1-R		CCACAGCAGTATTCGCTTGC
qZEP1-F	LOC_Os04g37619	TGGCATTGCCCTTGCCACAG
qZEP1-R		TGCTGCCTGCAGGATTTGCG
qNCED3-F	LOC_Os03g44380	GTTCAAGCTCCAGGAGATGC
qNCED3-R		AGAGGTGGAAGCAGAAGCAG
qNCED2-F	LOC_Os12g24800	AACTTCGTGGTGGTACCCG
qNCED2-R		CGTCCGACTCGTTGAAGATG
q-bzip66-F	LOC_Os08g36790	AAGAACAGGGAGTCAGCAGC
q-bzip66-R		GCAACGCTTCTTTTGTCCGT
qRT Os03g0787300-F	LOC_Os03g0787300	ACCTCAAGAAGGCGTACCG
qRT Os03g0787300-R		CCTGAGCCAATTCCTTGAAC
qRT Os06g0142300-F	LOC_Os06g0142300	CGAAGGCCAACATCAACC
qRT Os06g0142300-R		CCTCGAACGAGTGCTTCC
qRT Os11g0461200-F	LOC_Os11g0461200	GACGTCGTGCTCTTCGACTT
qRT Os11g0461200-R		CGGTGAAGACGGAGAAGTG
qRT Os03g0188400-F	LOC_Os03g0188400	CTGCATCTCAACGTGACCA
qRT Os03g0188400-R		TTGGAATCATCCTCCACCTT
qRT Os01g0739500-F	LOC_Os01g0739500	GCTGAAGCTCAAGAAGACCAGT
qRT Os01g0739500-R		CCGTCGTAGTATTTGGATAATCCTT
qRT Os06g0211200-F	LOC_Os06g0211200	GGAGTCCGCTGCTAGGTCT
qRT Os06g0211200-R		CAGTTTTGCCACCTCAGCTT
qRT Os01g0840100-F	LOC_Os01g0840100	GTCGTATGTCGCGTTCACC
qRT Os01g0840100-R		ATCAGTCGCTTGGCATCG
qRT Os01g0704300-F	LOC_Os01g0704300	GAGTTCGGGGTCACGAGTT
qRT Os01g0704300-R		CGCCGTACAGGTCCATCT
qRTOsbZIP60-F	LOC_Os07g44950	GGAGTTCAACATGGGACCTG
qRTOsbZIP60-R		GCTATCAGAAAGCTCCGAGAAG
qRTOsbZIP45-F	LOC_Os05g49420	GCTATCAGAAAGCTCCGAGAAG
qRTOsbZIP45-R		TTTCTGCCTGGGTCGATG
qRTOsbZIP46-F	LOC_Os06g10880	GGAGTCCGCTGCTAGGTCT
qRTOsbZIP46-R		CAGTTTTGCCACCTCAGCTT
qRTOsbZIP12-F	LOC_Os01g64730	TCACGGGAGAGGAAGCAG
qRTOsbZIP12-R		TGATGTTGCTCCTCCTGTTCT
qRTOsbZIP78-F	LOC_Os10g38820	AACAACGAGCTCAAGTTCAGG
qRTOsbZIP78-R		TCAGTGCCTCGTTCAATGC
qRTOsNAC52-F	LOC_Os06g45140	AGAACACCCTCCGGCTAGA
qRTOsNAC52-R		TGGCTCATCATATTCGAACG
qRTOsHsp24.1-F	LOC_Os02g52150	ACCTGAGGGTGGACATGC
qRTOsHsp24.1-R		TTGATCACGAGGCTGTTCTG
qRTOsGS1;3-F	LOC_Os03g50490	AAGGTCATCGCCGAGTACA
qRTOsGS1;3-R		GCTTGGGTCATCAACAGGTC
qRT AGPS1-F	LOC_Os09g12660	GTGCCACTTAAAGGCACCATT
qRT AGPS1-R		CCCACATTTCAGACACGGTTT
qRT AGPS2a-F	LOC_Os08g25734	ACTCCAAGAGCTCGCAGACC
qRT AGPS2a-R		GCCTGTAGTTGGCACCCAGA
qRT AGPS2b-F	LOC_Os08g25734	AACAATCGAAGCGCGAGAAA
qRT AGPS2b-R		GCCTGTAGTTGGCACCCAGA
qRT BEI-F	LOC_Os02g32660	TGGCCATGGAAGAGTTGGC
qRT BEI-R		CAGAAGCAACTGCTCCACC
qRT AGPL1-F	LOC_Os05g50380	GGAAGACGGATGATCGAGAAAG
qRT AGPL1-R		CACATGAGATGCACCAACGA
qRT AGPL2-F	LOC_Os01g44220	AAGAGGTGCTTTGGTGATG
qRT AGPL2-R		GTCCGAAGATGAGGAGTGT
qRT BEIIb-F	LOC_Os02g32660	ATGCTAGAGTTTGACCGC
qRT BEIIb-R		AGTGTGATGGATCCTGCC
qRT-FLO2-F	LOC_Os04g55230	CAAGAGTCCGTCAGGTCG
qRT-FLO2-R		GTGCTGCTTGCTTCTTCTAC
qRT-FLO4-F	LOC_Os05g33570	CTTGGTTTCCGTGGGTGC
qRT-FLO4-R		AGCCTGCTCTGCTATCTCAT
qRT ISA2-F	LOC_Os05g32710	TAGAGGTCCTCTTGGAGG
qRT ISA2-R		AATCAGCTTCTGAGTCACCG
qRT PHOL-F	LOC_Os03g55090	TTGGCAGGAAGGTTTCGCT
qRT PHOL-R		CGAAGCCTGAAGTGAACTTGCT
qRT PUL-F	LOC_Os04g0164900	ACCTTTCTTCCATGCTGG
qRT PUL-R		CAAAGGTCTGAAAGATGGG
qRT SSIIa-F	LOC_Os06g12450	GCTTCCGGTTTGTGTGTTCA
qRT SSIIa-R		CTTAATACTCCCTCAACTCCACCAT
qRT Waxy-F	LOC_Os06g04200	AACGTGGCTGCTCCTTGAA
qRT Waxy-R		TTGGCAATAAGCCACACACA
This is the end of this table
